# Supplementary material
Source: PubMed Central journal article supplement (PMC10281564)
Supplement: NIHMS1908803-supplement-1.pdf [file NIHMS1908803-supplement-1.pdf]

A

Zeb2 Mir5129 Gm28643

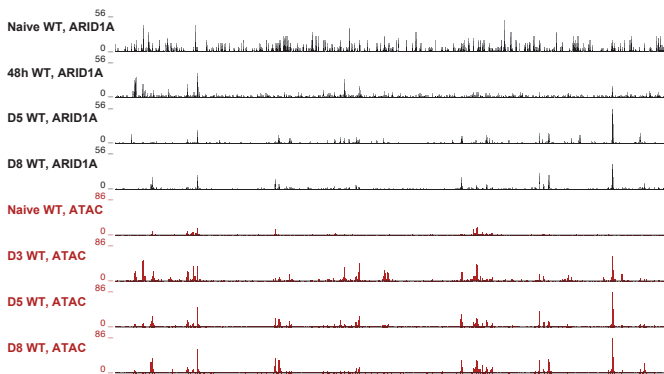

Tbx21

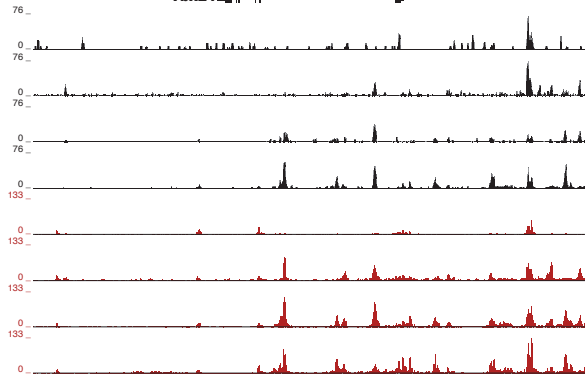

Gm17055 Bhlhe40

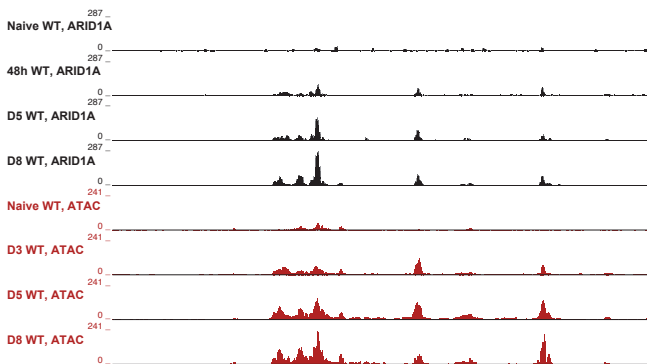

B

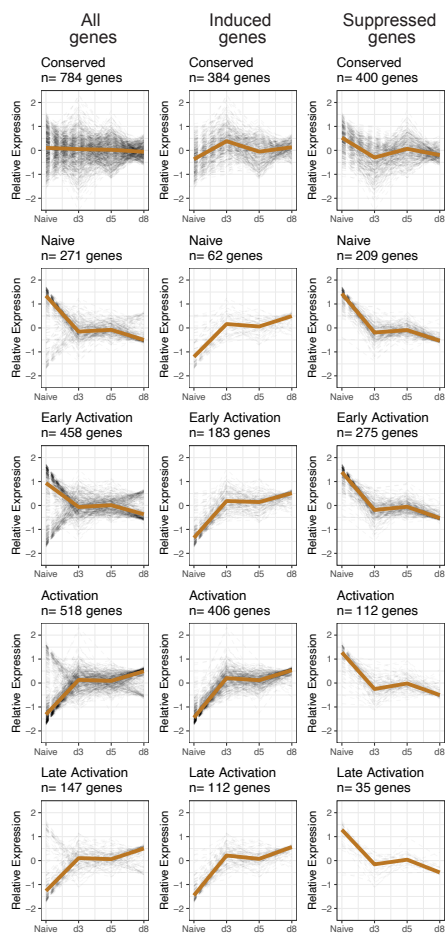

C

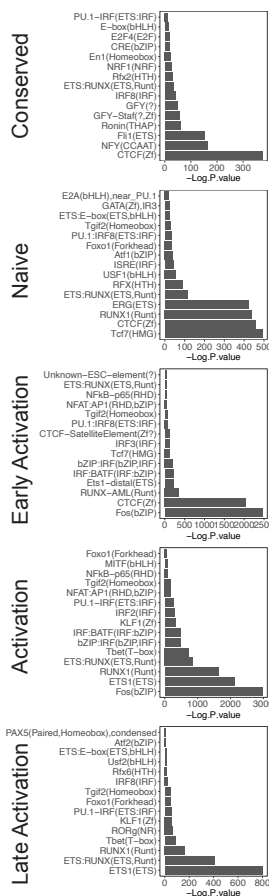

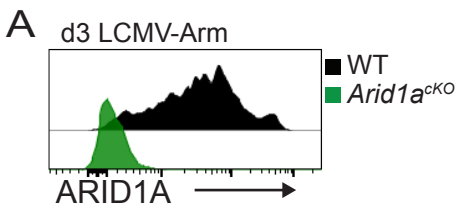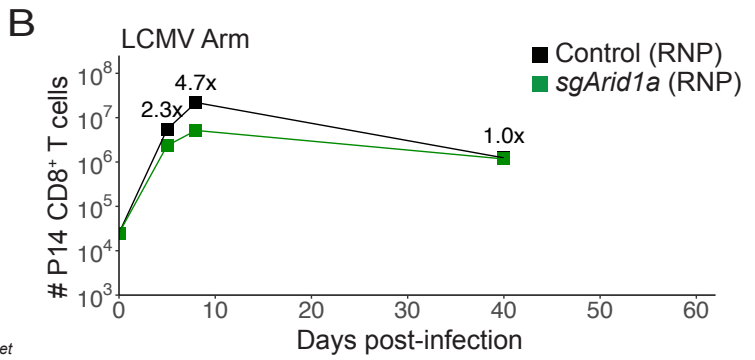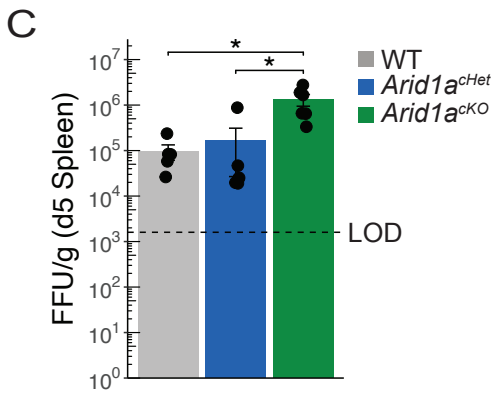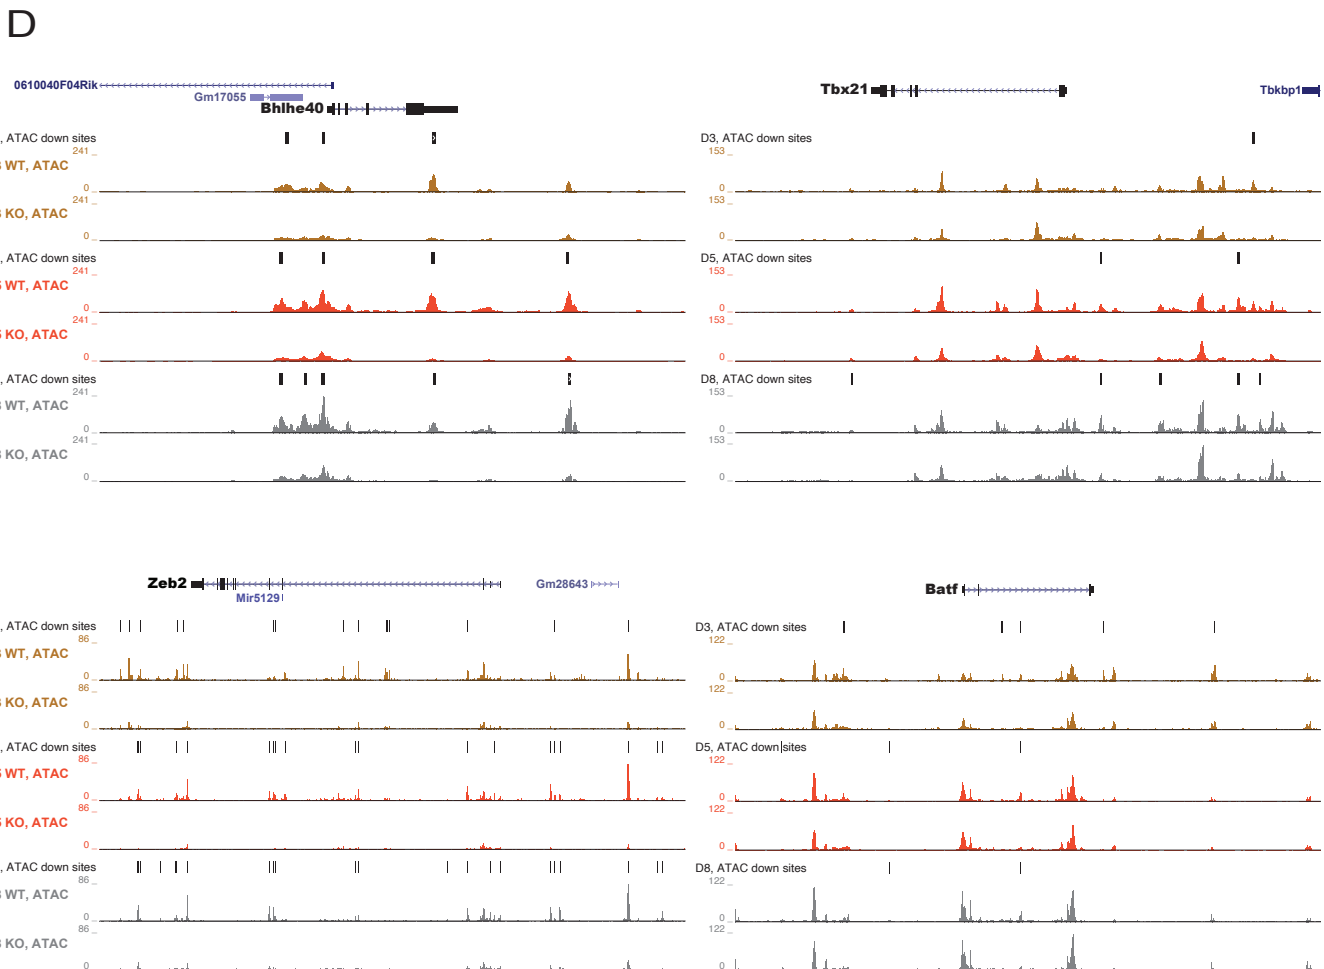

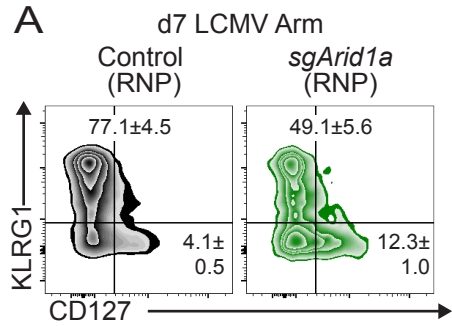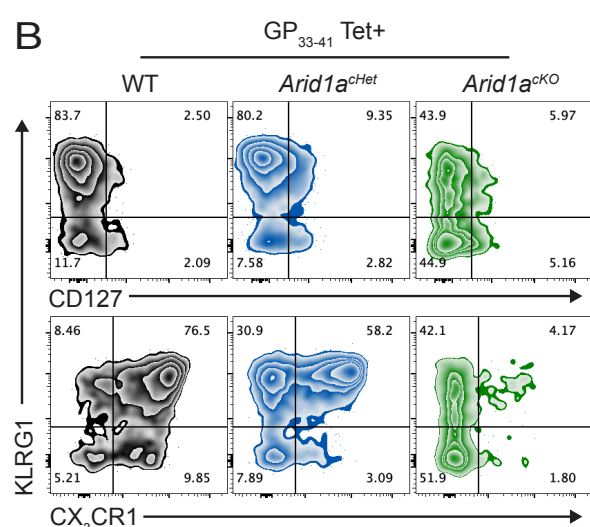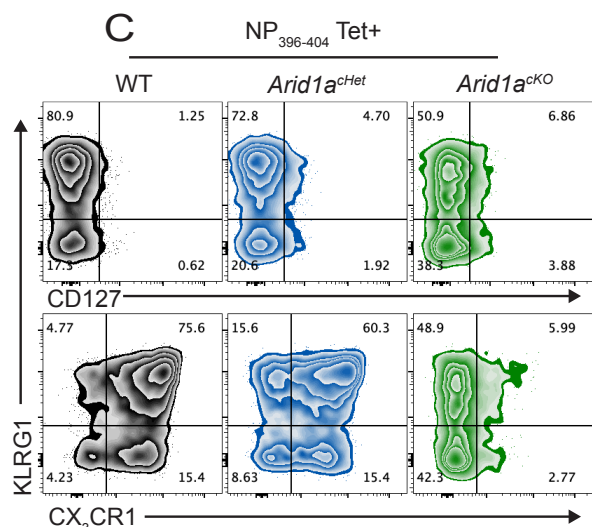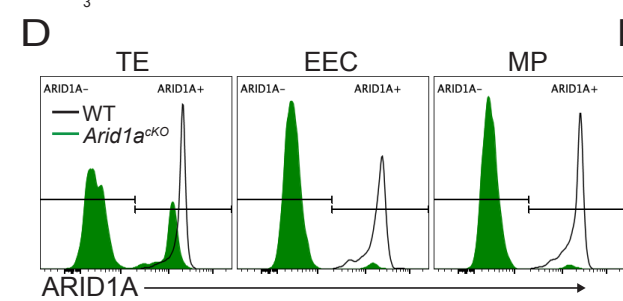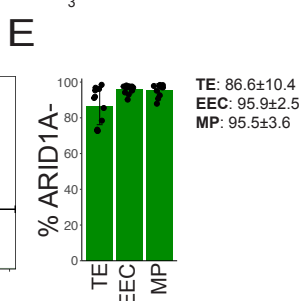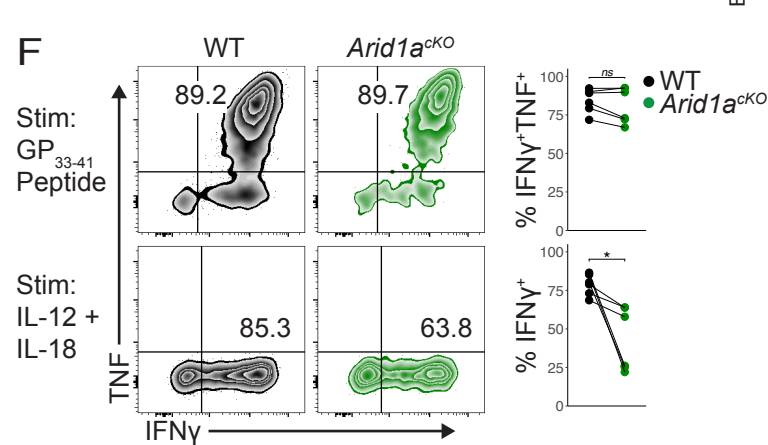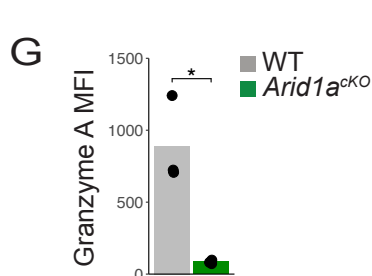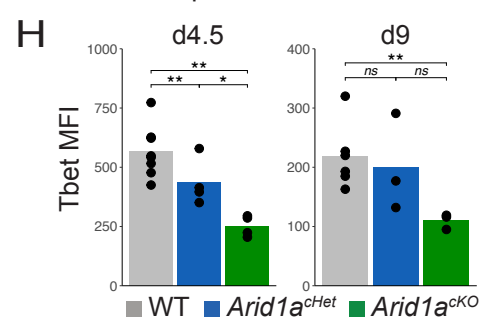

A

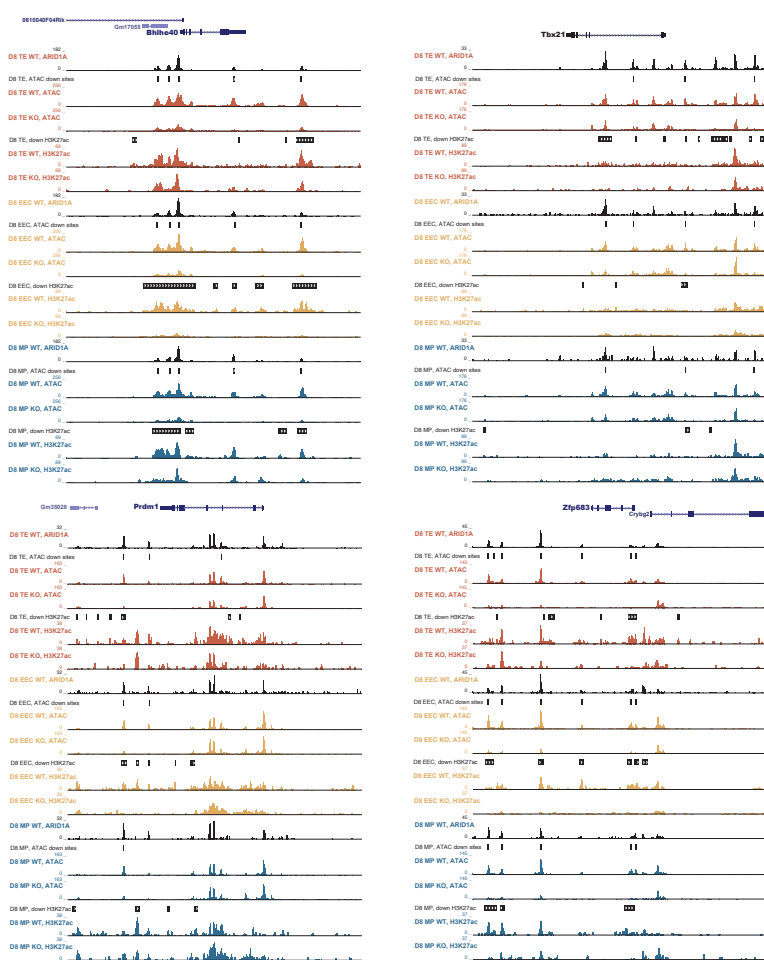

B

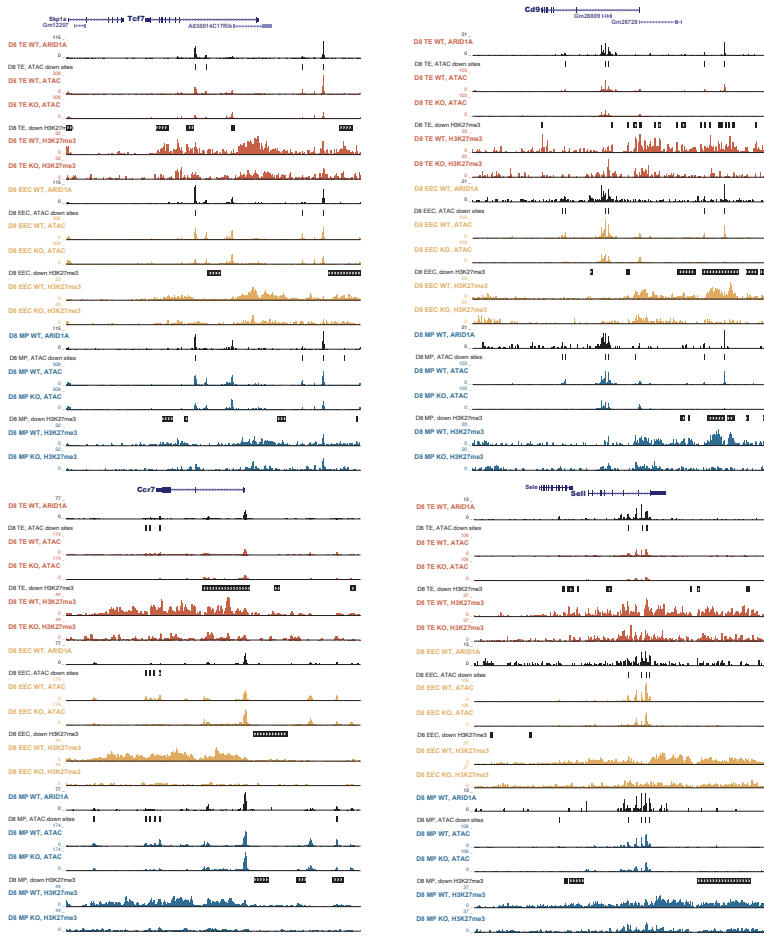

A

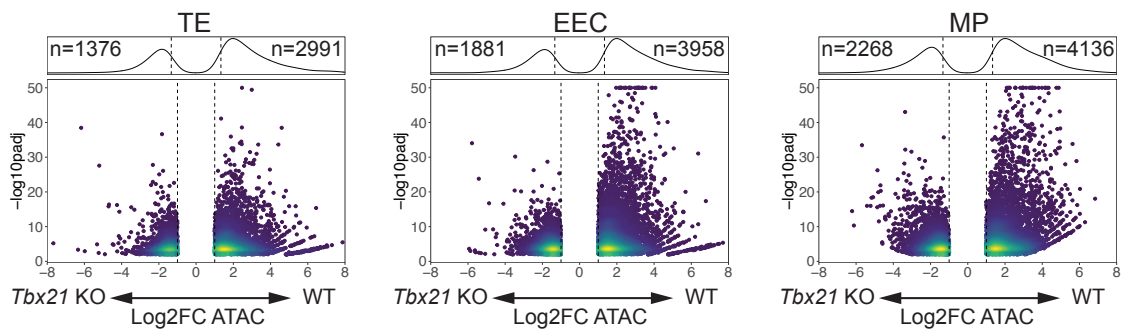

B

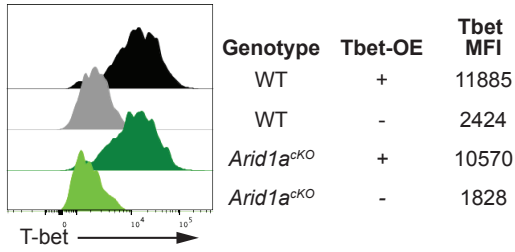

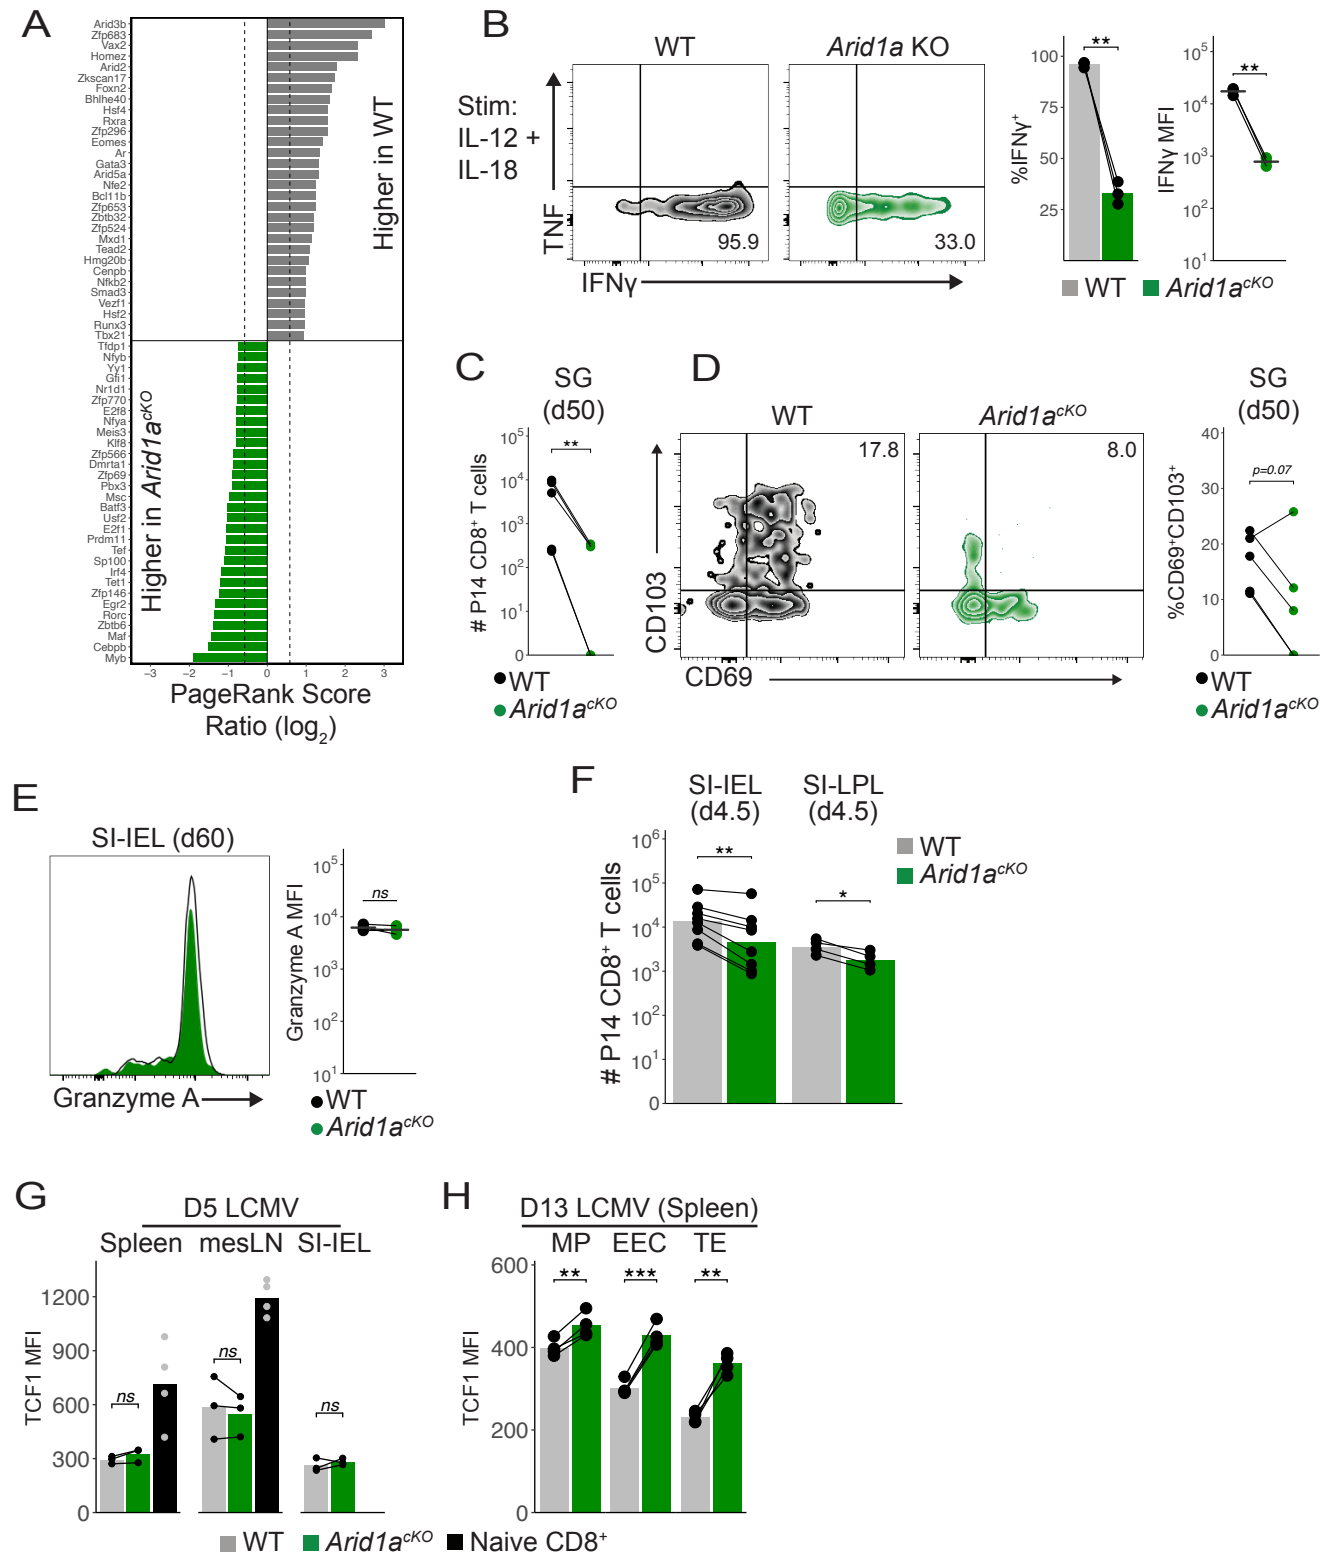

**Figure S1. Chromatin accessibility and ARID1A binding in antiviral CD8<sup>+</sup> T cells, related to Figure 1**

(A) ARID1A CUT&RUN and ATAC-seq signal tracks at *Zeb2*, *Tbx21*, and *Bhlhe40*. (B) Relative gene expression of genes annotated to OCR clusters in Fig 1A. Naïve samples are from GSE152841. (C) Top 15 motifs enriched in OCR clusters.

**Figure S2. ARID1A regulates accessibility of effector-associated TFs, related to Figure 2**

(A) Confirmation of efficient ARID1A deletion at 72h post-infection in *Arid1a<sup>ckO</sup>* P14 spleen cells. (B) Numbers of control RNP or sg*Arid1a* RNP P14 cells following LCMV-Armstrong infection. (C) LCMV titers in the spleen of WT (n=5), *Arid1a<sup>chEt</sup>* (n=6), and *Arid1a<sup>ckO</sup>* (n=6) mice d5 p.i. (D) ATAC-seq signal tracks at *Bhlhe40*, *Tbx21*, *Zeb2*, and *Batf*. LOD; limit of detection. \*p<0.05.

**Figure S3. *Arid1a* KO antiviral CD8<sup>+</sup> T cells are developmentally and functionally impaired, related to Figure 3**

(A) TE and MP cells in control or sg*Arid1a* RNP (*Arid1a* KO) P14 cells at 7d post-infection. Mean ± SEM of TE (KLRG1<sup>+</sup>CD127<sup>-</sup>) and MP (KLRG1<sup>+</sup>CD127<sup>+</sup>) cells are shown. (B) GP<sub>33</sub><sup>-</sup> and (C) NP<sub>396</sub>-tetramer<sup>+</sup> endogenous CD8<sup>+</sup> T cells at d8 post-infection. (D,E) ARID1A deletion efficiency in d8-d10 *Arid1a<sup>ckO</sup>* effector subsets (n=11). Mean ± SEM of ARID1A-deleted cells are shown for each subset. (F) Cytokine production from WT or *Arid1a<sup>ckO</sup>* P14 cells 7-8 days post-infection stimulated with either GP33 peptide or IL-12 and IL-18. Representative flow plots show the frequency of IFNγ<sup>+</sup>TNF<sup>+</sup> (top) cells after peptide stimulation and frequency of IFNγ<sup>+</sup> (bottom) cells after IL-12 and IL-18 stimulation. Paired t-test. (G) Granzyme A staining in WT and *Arid1a* P14 cells at d8 p.i. (H) T-bet staining in WT, *Arid1a<sup>chEt</sup>*, and *Arid1a<sup>ckO</sup>* effector cells at d4.5 or d9 post-infection. ns, not significant; \*p<0.05, \*\*p<0.005

**Figure S4. ARID1A regulates accessibility and deposition of histone modifications, related to Figure 4**

(A) ATAC-seq and H3K27ac CUT&RUN signal tracks at (A) *Bhlhe40*, *Tbx21*, *Prdm1*, and *Zfp683*. (B) ATAC-seq and H3K27me3 CUT&RUN signal tracks at *Tcf7*, *Cd9*, *Ccr7*, and *Sell*.

**Figure S5. T-bet regulates chromatin accessibility profiles in effector CD8<sup>+</sup> T cells, related to Figure 5**

(A) Differential accessibility analysis of WT and *Tbx21* KO TE, EEC, and MP P14 cells at d8 p.i. Numbers of differentially accessible peaks are shown (Fold change ≥ 2, adjusted p value < 0.01, Benjamini-Hochberg). (B) T-bet expression in WT and *Arid1a<sup>ckO</sup>* cells transduced with control or T-bet overexpression retrovirus and cultured *in vitro* for 72h.

**Figure S6. ARID1A promotes Trm formation, related to Figure 6**

(A) Taiji PageRank TF score ratios in WT versus *Arid1a<sup>ckO</sup>* MP cells. The top 30 TFs with a threshold ratio of fold change > 1.5 in each direction are shown. (B) IFNγ production by WT and *Arid1a<sup>ckO</sup>* memory P14 cells stimulated with IL-12 and IL-18 *in vitro* at d60 post-infection. (C) Absolute numbers and (D) CD69/CD103 expression profiles of IV- WT and *Arid1a* KO salivary gland Trm cells at d50 post-infection. (E) Granzyme A staining in WT and *Arid1a<sup>ckO</sup>* SI-IEL Trm. (F) Absolute numbers of WT and *Arid1a<sup>ckO</sup>* SI-IEL and SI-LPL cells at d4.5 p.i. (G) TCF1 expression in naïve WT CD8<sup>+</sup> T cells and WT or *Arid1a<sup>ckO</sup>* effector cells 5d p.i. in spleen, mesenteric lymph node (mesLN), and SI-IEL. (H) TCF1 expression in WT and

*Arid1a*<sup>CKO</sup> MP, EEC, and TE cells 13d p.i. Paired t-test was used in cases where line connects observations. *ns*, not significant; \* $p < 0.05$ , \*\* $p < 0.005$ , \*\*\* $p < 0.0005$ .
